# Supplementary material for: Saccharomyces cerevisiae reduces vulvovaginal candidiasis severity through modulation of fungal pathogenicity and inflammatory responses
Source: Research Square preprint supplement (doi:10.21203/rs.3.rs-6795973/v1), 2025-06-17
Supplement: Supplementary file 1 [file 0963aac498d50a34efbb17c2.docx]

***Saccharomyces cerevisiae* reduces vulvovaginal candidiasis severity through modulation of fungal pathogenicity and inflammatory responses**

**Mart Sillen1,2**, Dania El Abyad1, Nina Vreys1, Silke Baldewijns1, Ilse Palmans1, Odessa Van Goethem1, Kar On Cheng3, Greetje Vande Velde4, Dolly E Montaño3, Mieke Gouwy5, Agustin R. Sharpe4, Axel Dietschmann3, Paul Vandecruys1, Sarah Lebeer2, Liesbeth Demuyser1, Mark S. Gresnigt3,*, Patrick Van Dijck1,6,*

**SUPPLEMENTARY MATERIALS**


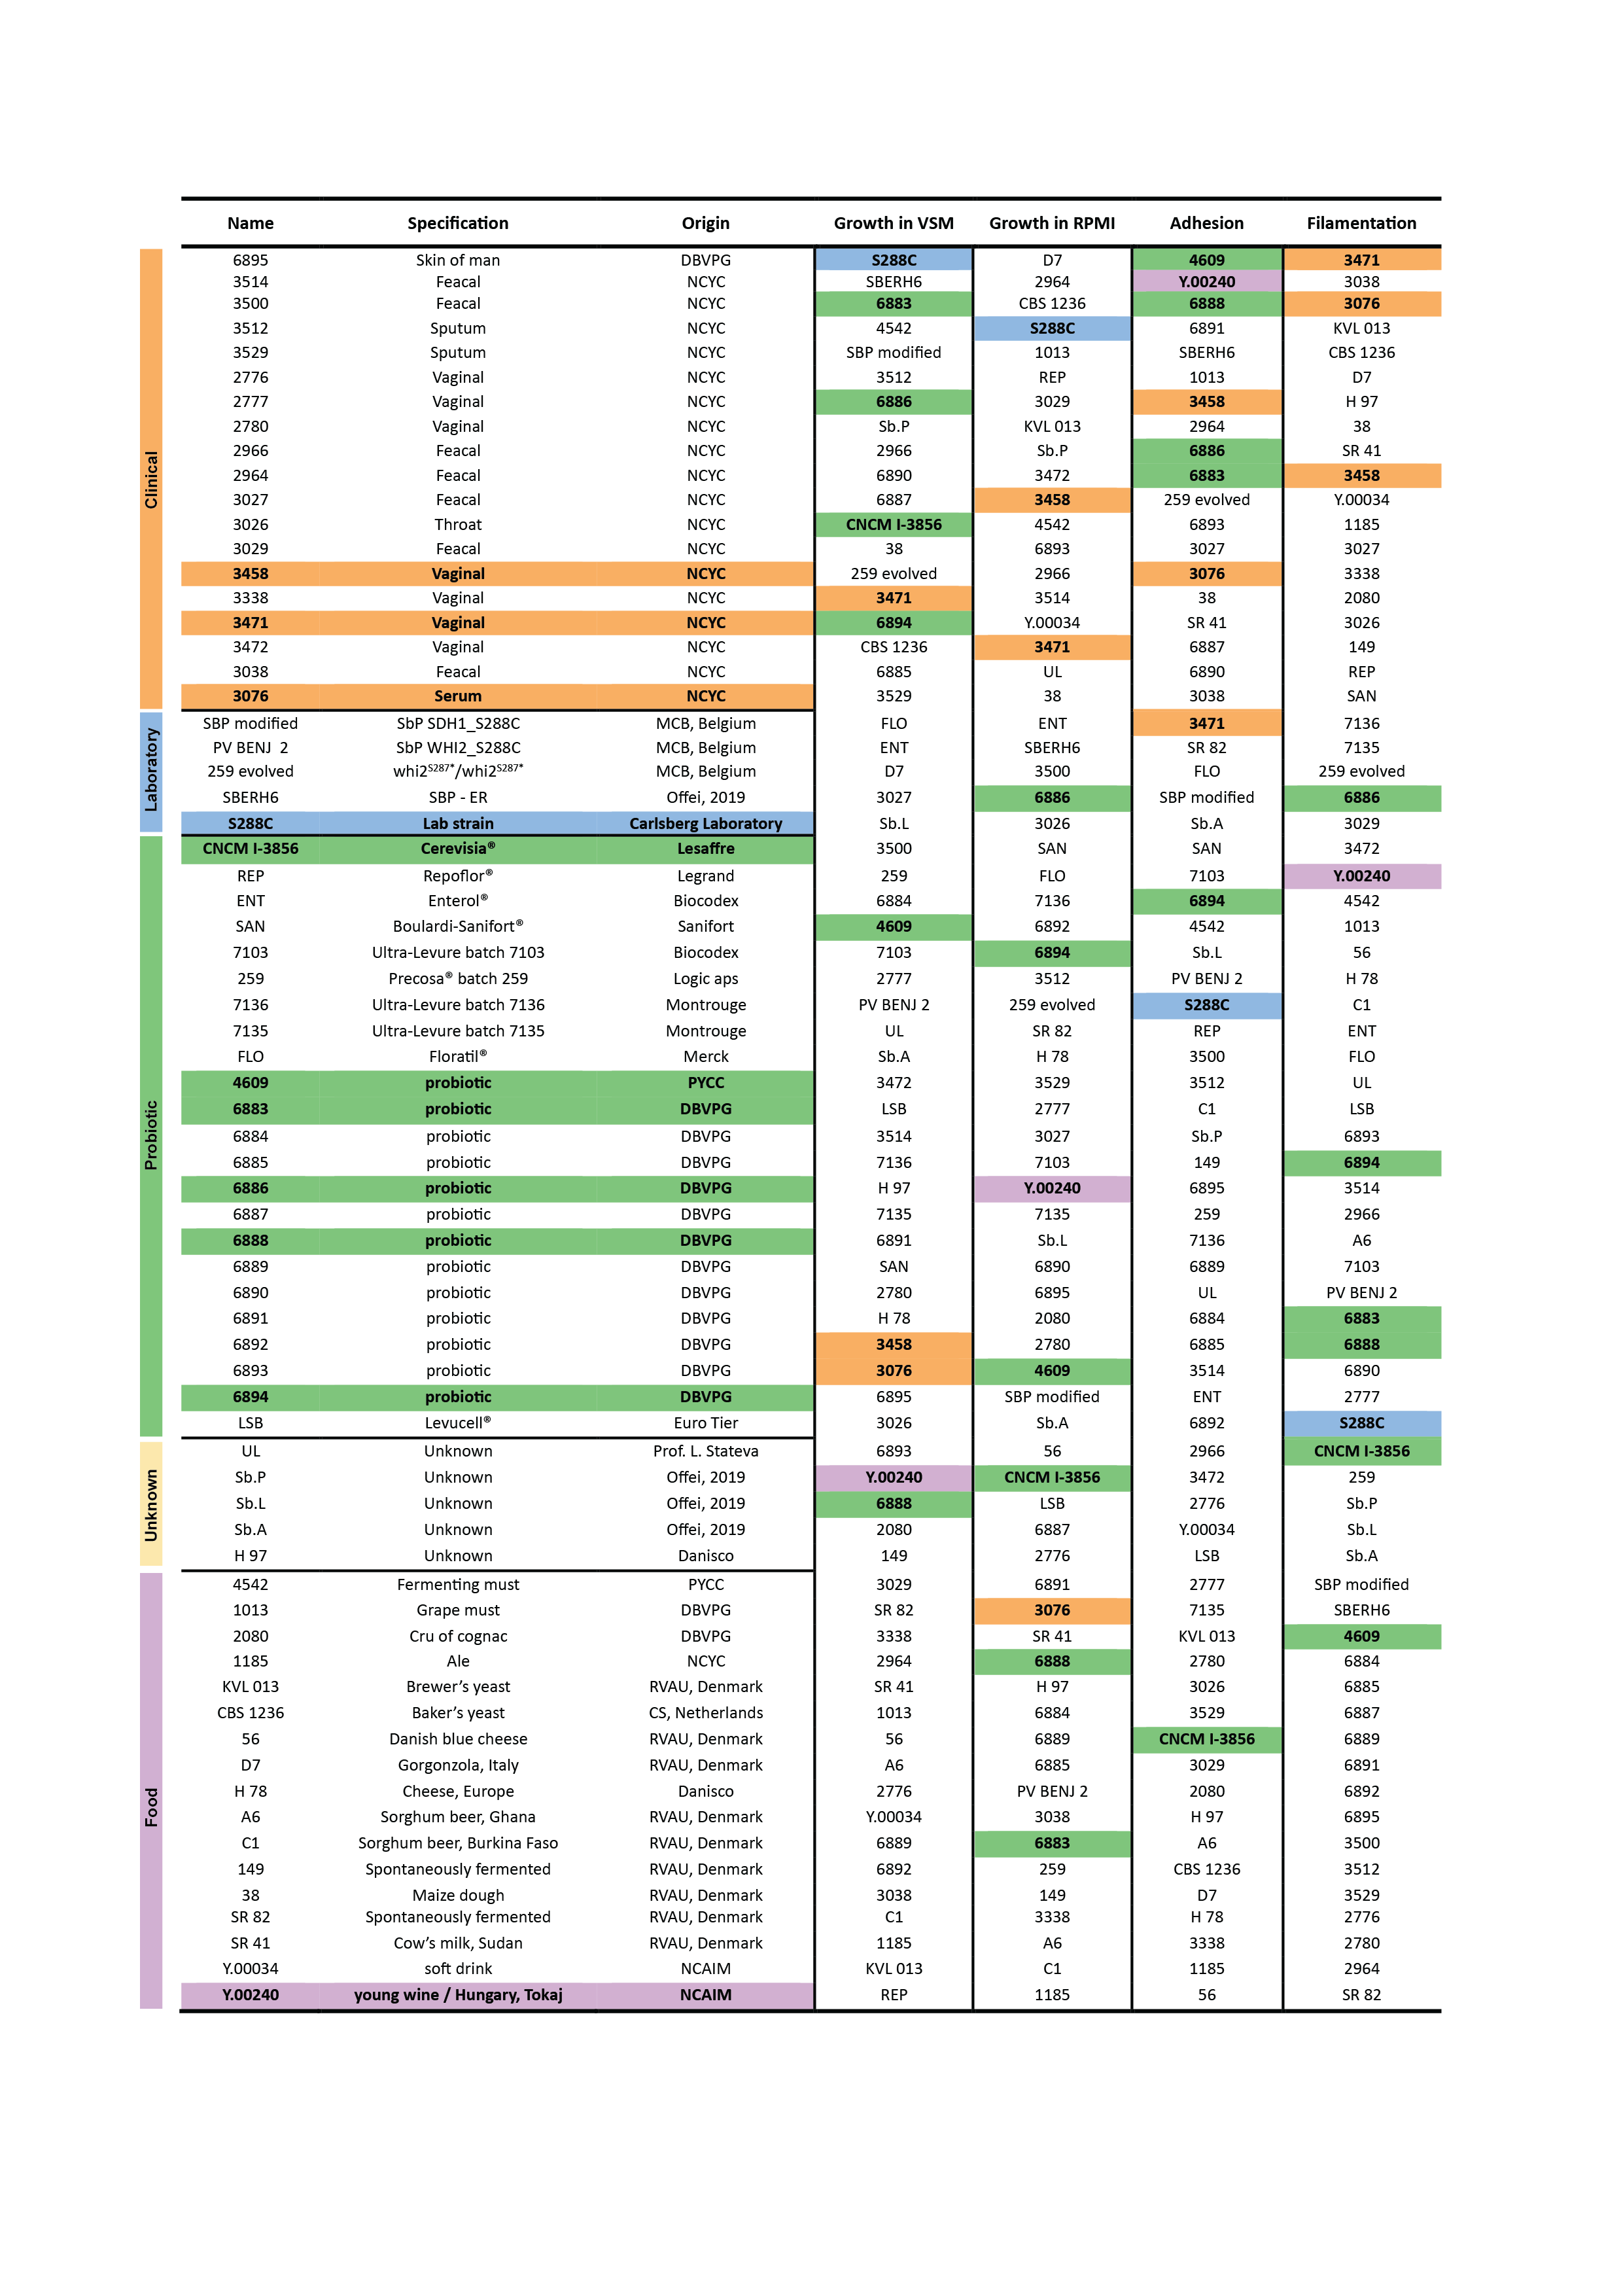
**Supplementary Table 1. Overview of *S. cerevisiae* isolates.** Detailing their background and performance in inhibiting *C. albicans* CA3153 pathogenicity (Growth, Adhesion, and Filamentation). The strains selected for further investigation are highlighted.


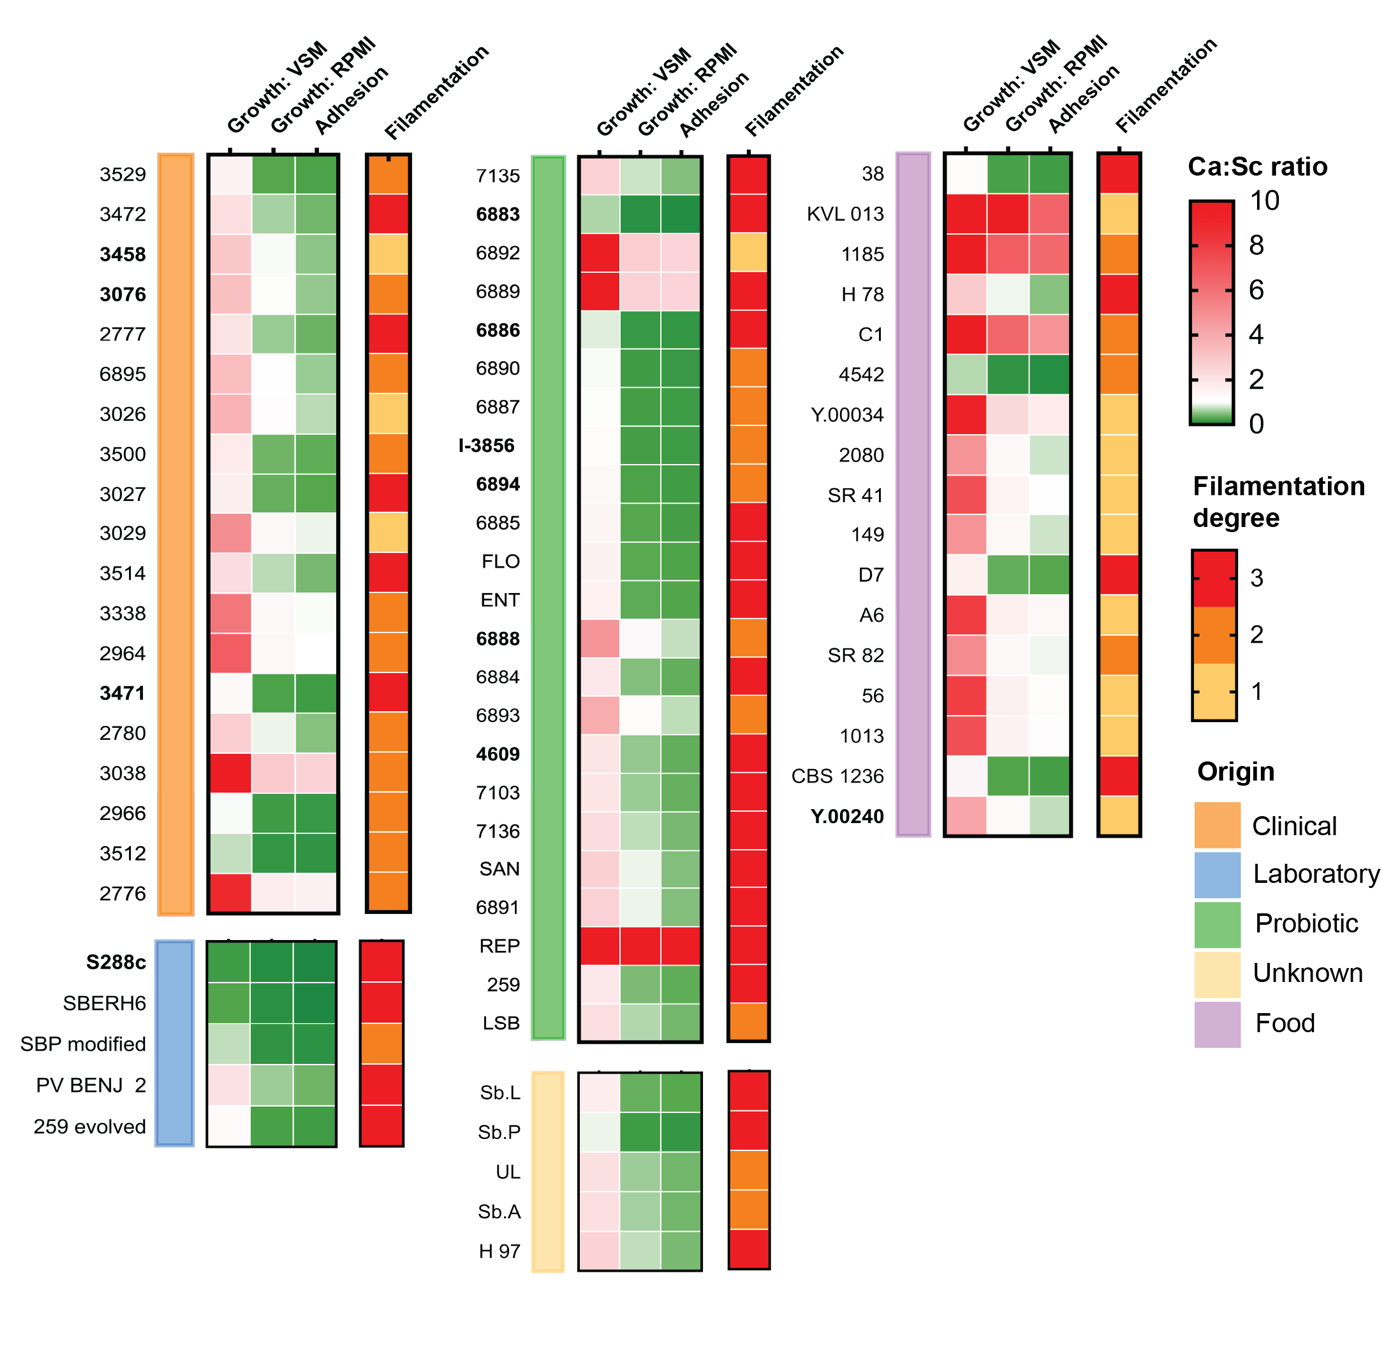
**Supplementary Fig. 1: Effects of *S. cerevisiae* on *C. albicans* growth, adhesion, and filamentation by origin.** The heatmaps represent three conditions: Growth on VSM, growth on RPMI, and adhesion, with color intensities indicating the Ca:Sc ratio. Green corresponds to low ratios (approaching 0), transitioning through white to red, representing high ratios (up to 10). Adjacent to these growth heatmaps, filamentation degree is depicted as a categorical variable, color-coded as follows: yellow for degree 1 (pseudohyphae), orange for degree 2 (few hyphae), and red for degree 3 (abundant hyphae). The colored bars on the left denote the origin of the *S. cerevisiae* strains, providing a clear visual representation of strain-specific phenotypic variability across different conditions.


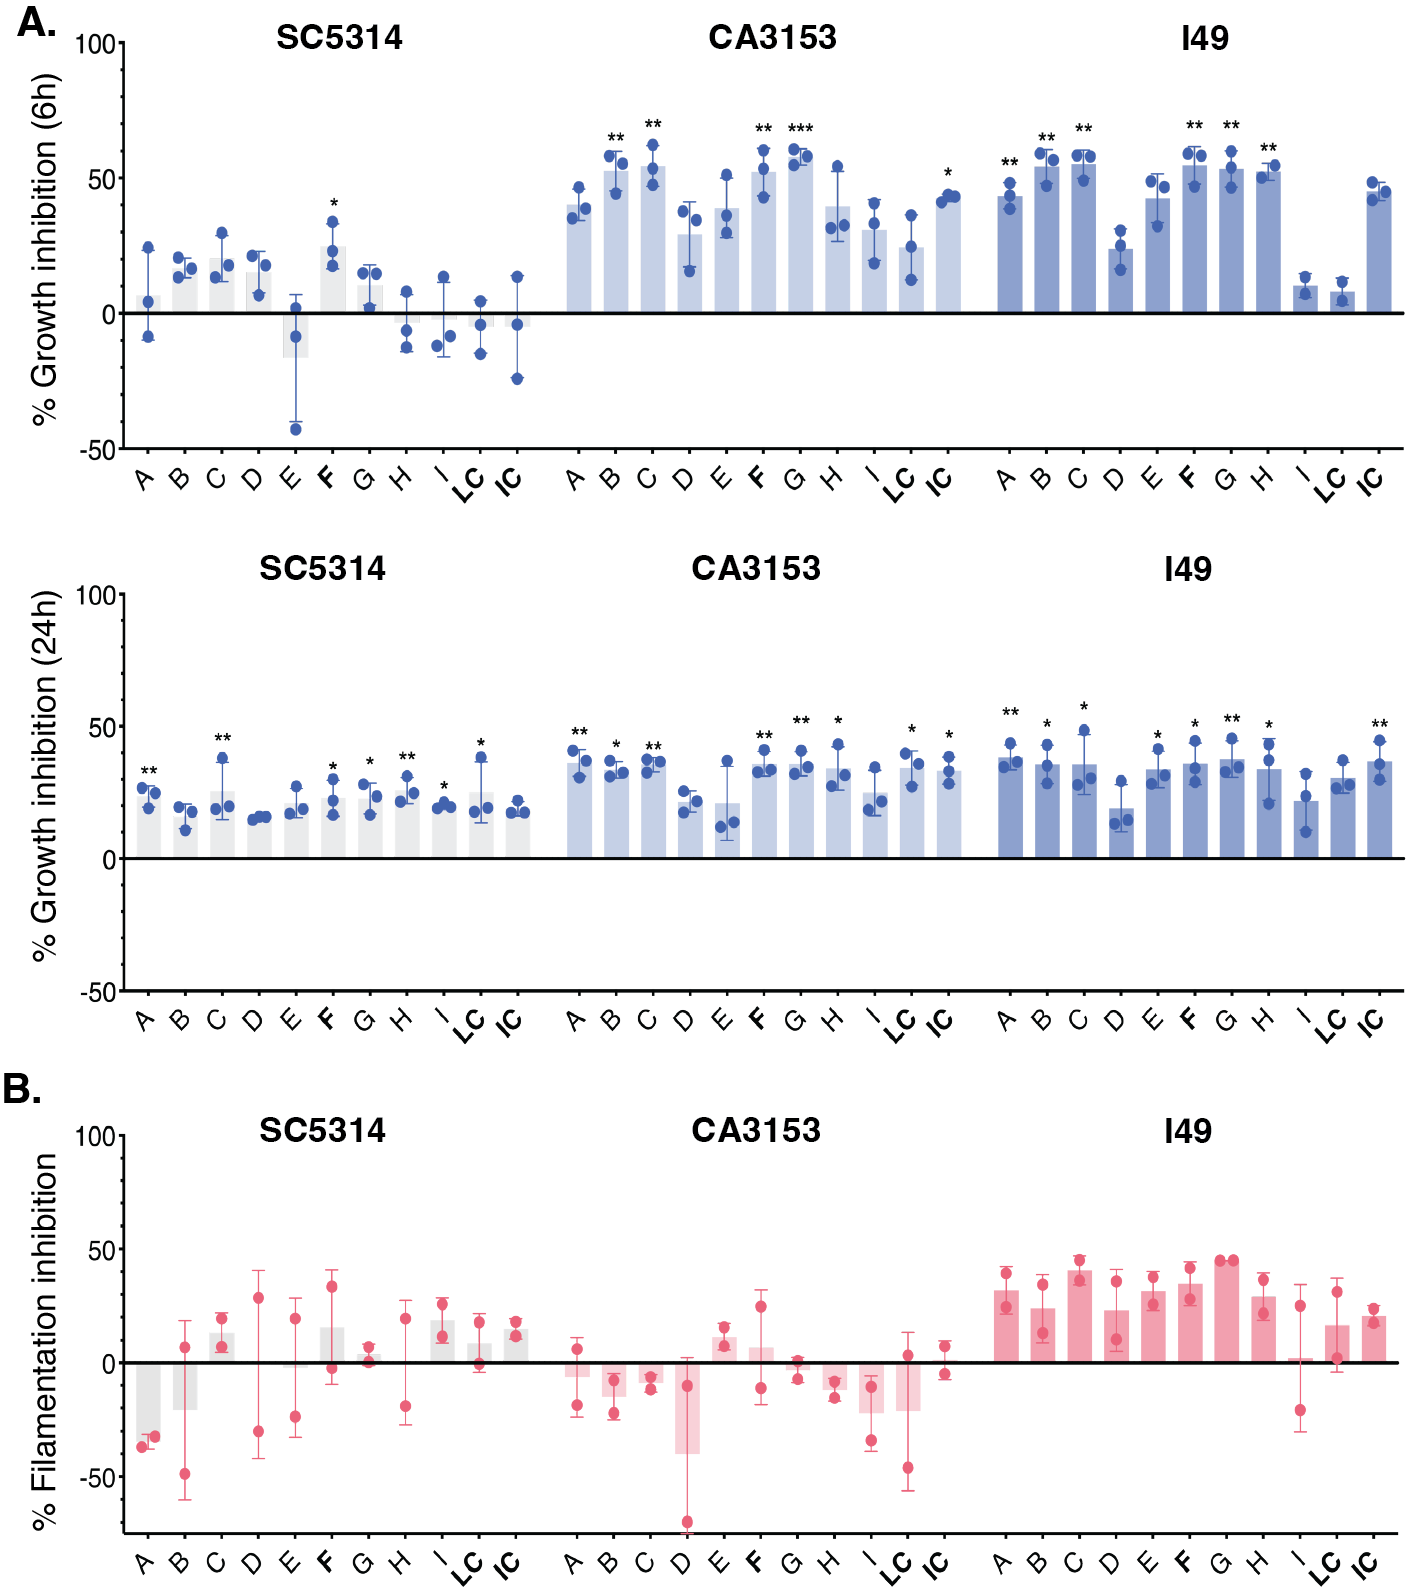
**Fig. S2: Evaluation of top candidate *S. cerevisiae* isolates for inhibitory properties against *C. albicans* in RPMI. A.** Inhibition of *C. albicans* growth by *S. cerevisiae* isolates (A-I, LC = lab control S288C, IC = probiotic standard CNCM I-3856) in RPMI after 6 hours (upper panel) and 24 hours (lower panel). **C.** Inhibition of *C. albicans* filamentation by *S. cerevisiae* in VSM after 3 hours. All values are presented as mean ± standard deviation (s.d.) from n≥2 independent experiments, with dots representing the mean of the technical replicates of the individual experiments. Data were transformed using a Box-Cox transformation to meet linear regression assumptions. Statistical significance was determined using a one-sample t-test against a theoretical mean of 0%, representing *C. albicans* alone. Significant differences are indicated as *p < 0.05, **p < 0.01, ***p < 0.001.

**
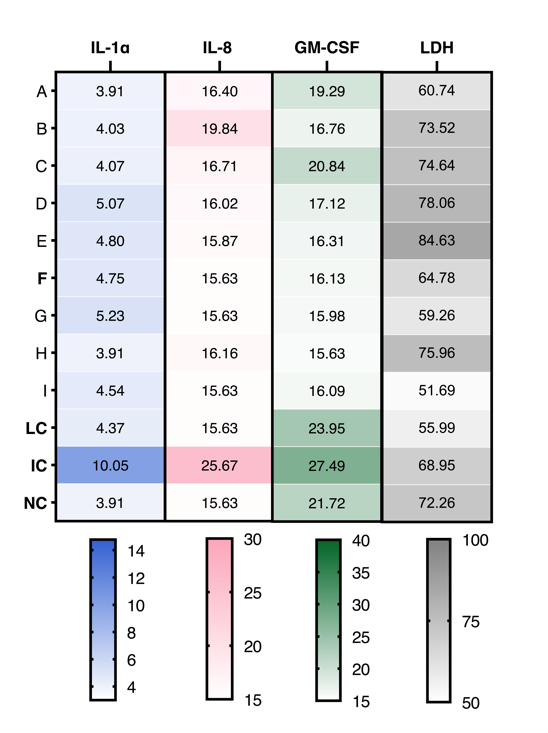
Fig. S3:** ***S. cerevisiae* modulates *C. albicans*-induced VECs cytokine release and LDH levels.** Levels of IL-1α, IL-1Ra, IL-8, GM-CSF, and LDH measured across experimental groups (A–I) and controls (Lab Control (LC), Industrial Control (IC), and Negative Control (NC)). Conditions include treatments with varying combinations of stimuli or controls, as indicated. Data are displayed as a heatmap with color scales representing relative intensities from n ³ 2 experiments.


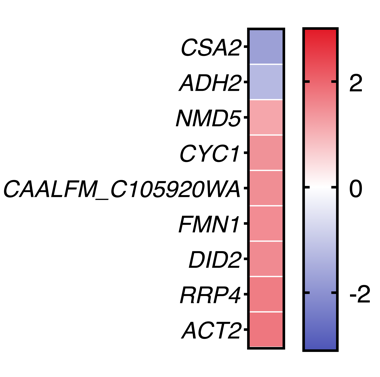


**Fig. S4: *S. cerevisiae* induces minimal transcriptional changes in *C. albicans* during epithelial infection 6 hpi.**Heatmap of transcriptional changes of *C. albicans* upon exposure Sc3458. Gene expression is shown as Log2 fold change, with significant downregulation indicated (Log2 > 1 or < −1, p < 0.05). Data represent mean ± standard deviation (s.d.) from n ≥ 3 independent experiments, with dots representing the mean of technical replicates.


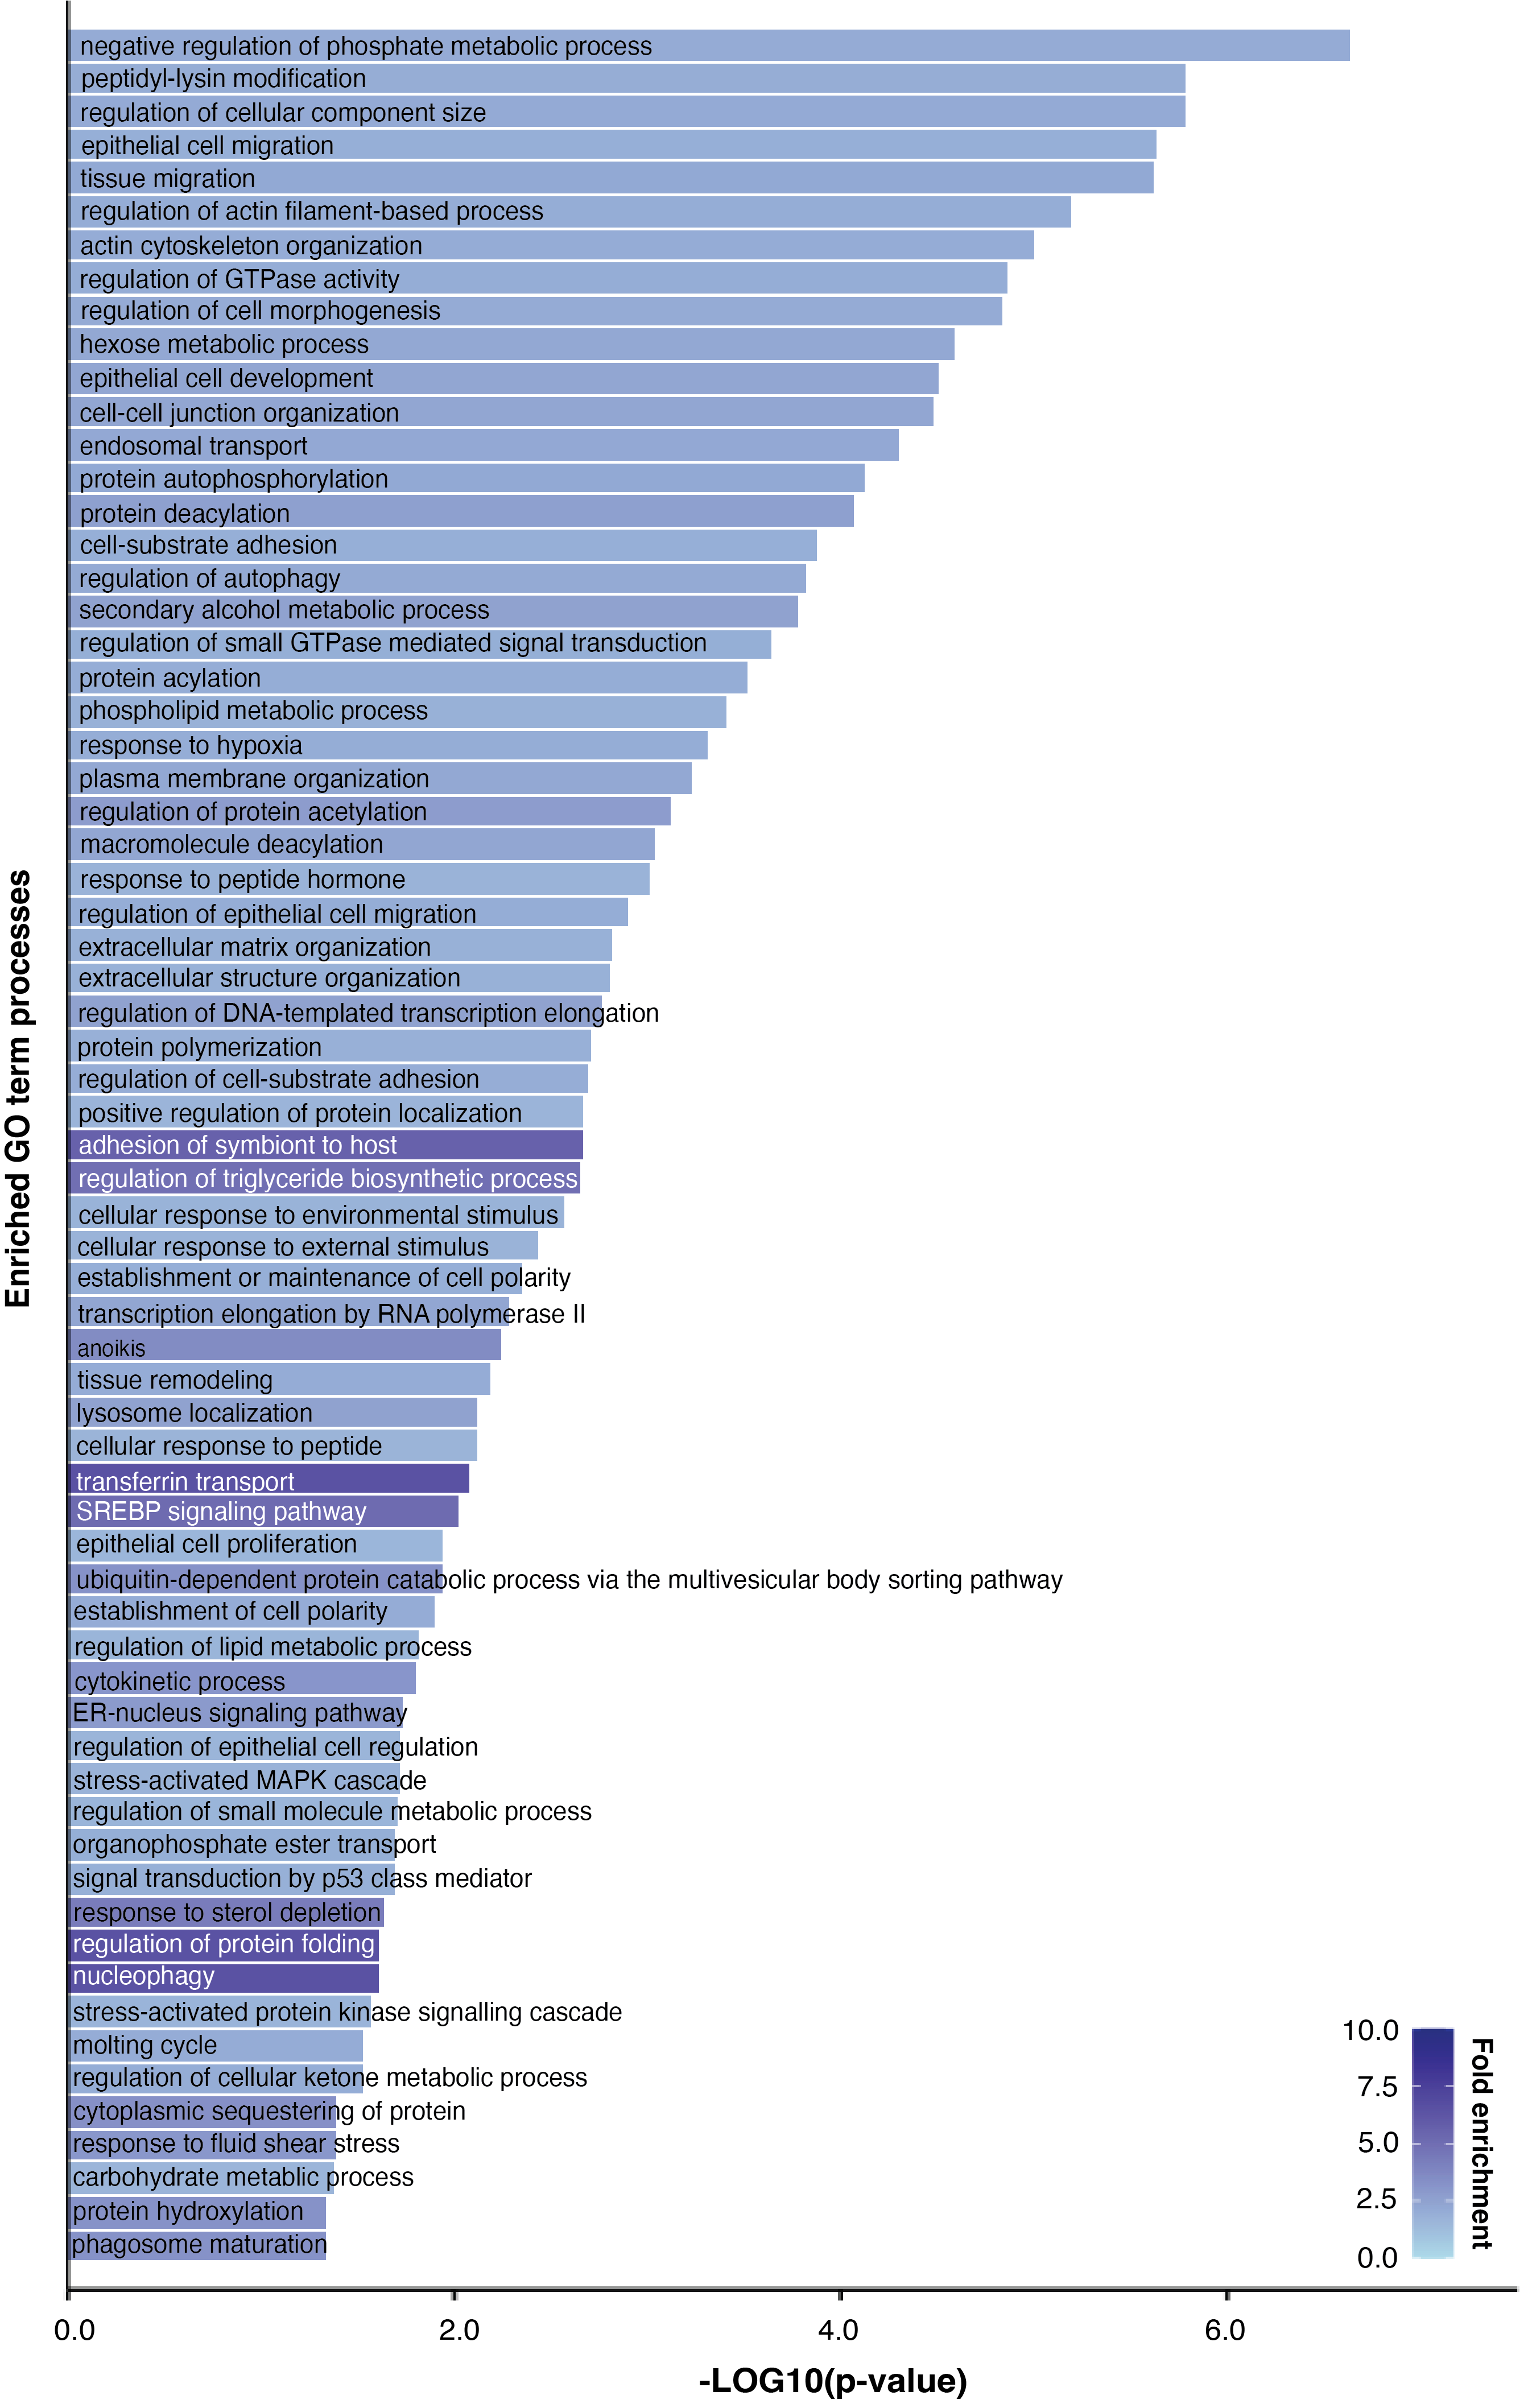
 **Fig. S5: Impact of *S. cerevisiae* strain 3458 on human transcriptional reprogramming: all down-regulated GO term processes.** Gene Ontology (GO) term enrichment analysis of upregulated genes in VECs at 24 hpi, based on a Log2 fold change >1 or <−1 and a p-value <0.05. GO terms were identified using ShinyGO (<http://bioinformatics.sdstate.edu/go/>). Enriched biological processes are plotted according to the –Log10 p-value, derived from a Bonferroni-corrected distribution. Fold enrichment values are visualized using the color gradient. Data presented are from n = 3 biological replicates.

**
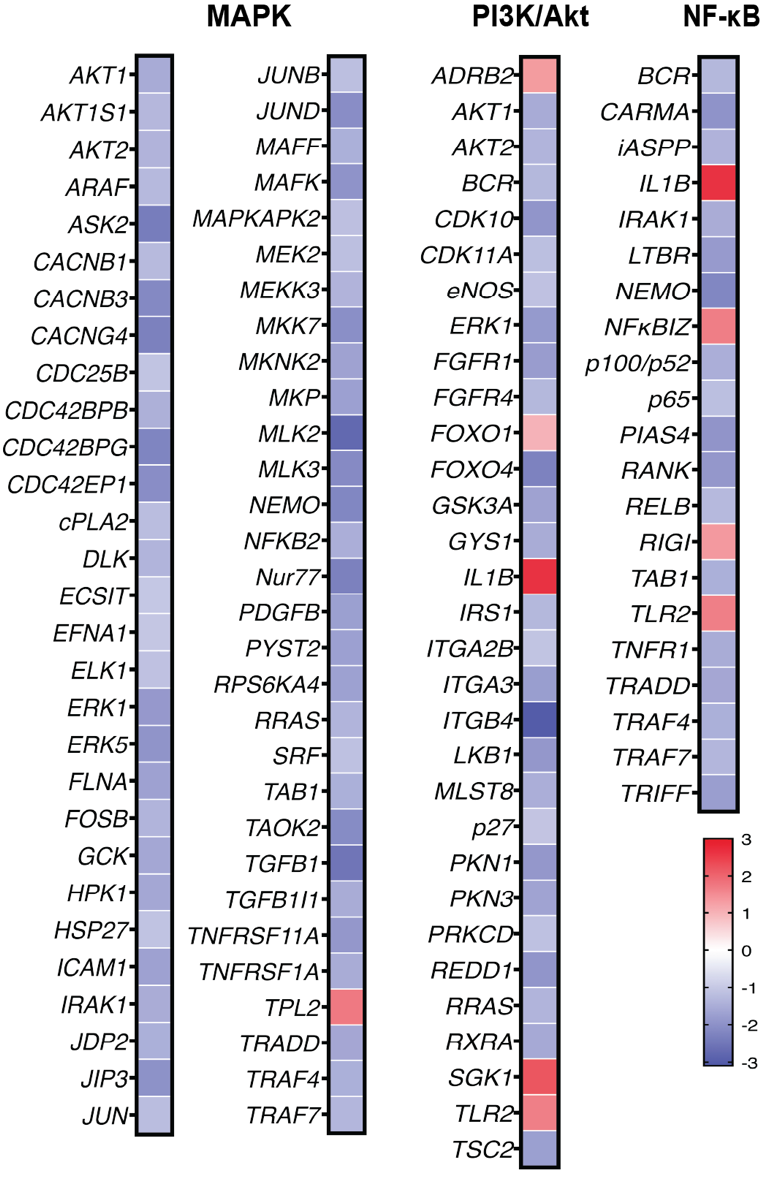
**

**Fig. S6: *S. cerevisiae* downregulates immune and inflammatory signaling pathways in VECs during VVC.** Heatmap depicting transcriptional changes in VECs at 24 hpi following exposure to Sc3458. Key pathways, including **MAPK**, **PI3K/Akt**, and **NF-κB** signaling, were predominantly downregulated. Color scale represents the Log2 fold change, with blue indicating downregulation and red indicating upregulation.

**
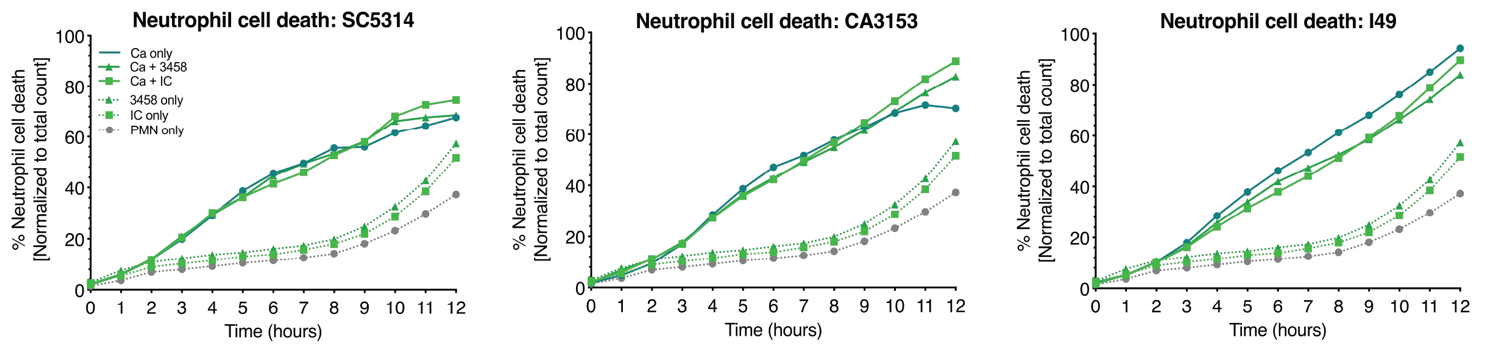
Fig. S7: The effect of *S. cerevisiae* on *C. albicans*-mediated neutrophil cell death.** Neutrophil cell deathinduced by *C. albicans* strains SC5314, CA3153, and I49 in the presence of Sc3458 or with the industrial control (IC, CNCM I-3856). Cell death was quantified over 12 hours via Sytox Green fluorescence and normalized to the total neutrophil count.

**
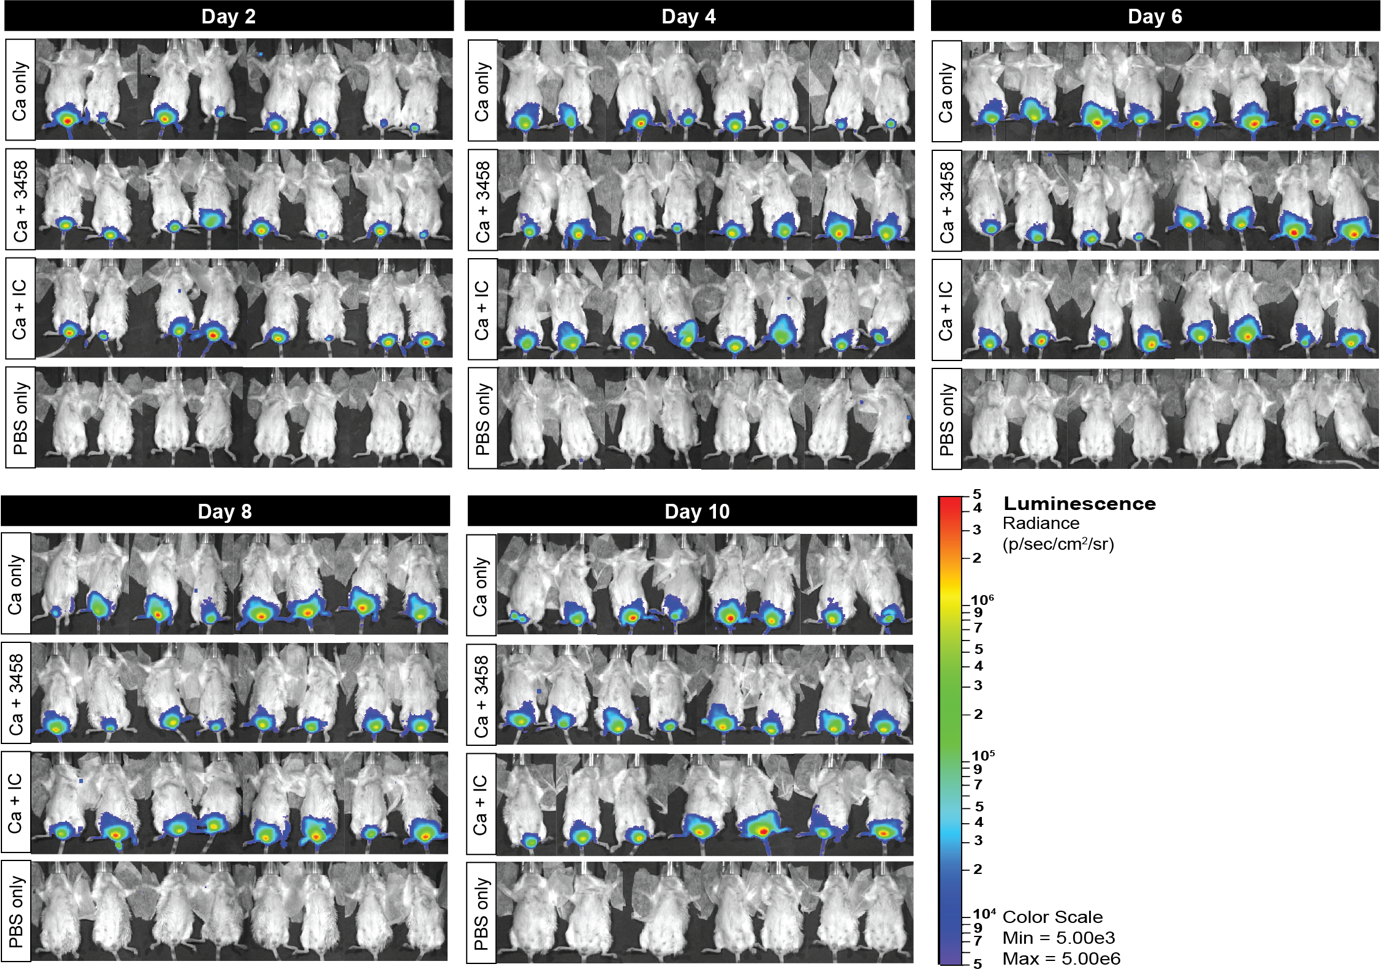
Fig. S8**: **Longitudinal BLI reveals sustained fungal control by *S. cerevisiae* 3458 in murine VVC.** *In vivo* bioluminescence imaging (BLI): Total photon flux in *C. albicans*-infected mice treated with Sc3458, industrial control strain (IC, CNCM I-3856), or PBS, acquired on days 2, 4, 6, 8, and 10 post-infection (n ≥ 7). PBS-treated mice serve as uninfected baseline controls.

**
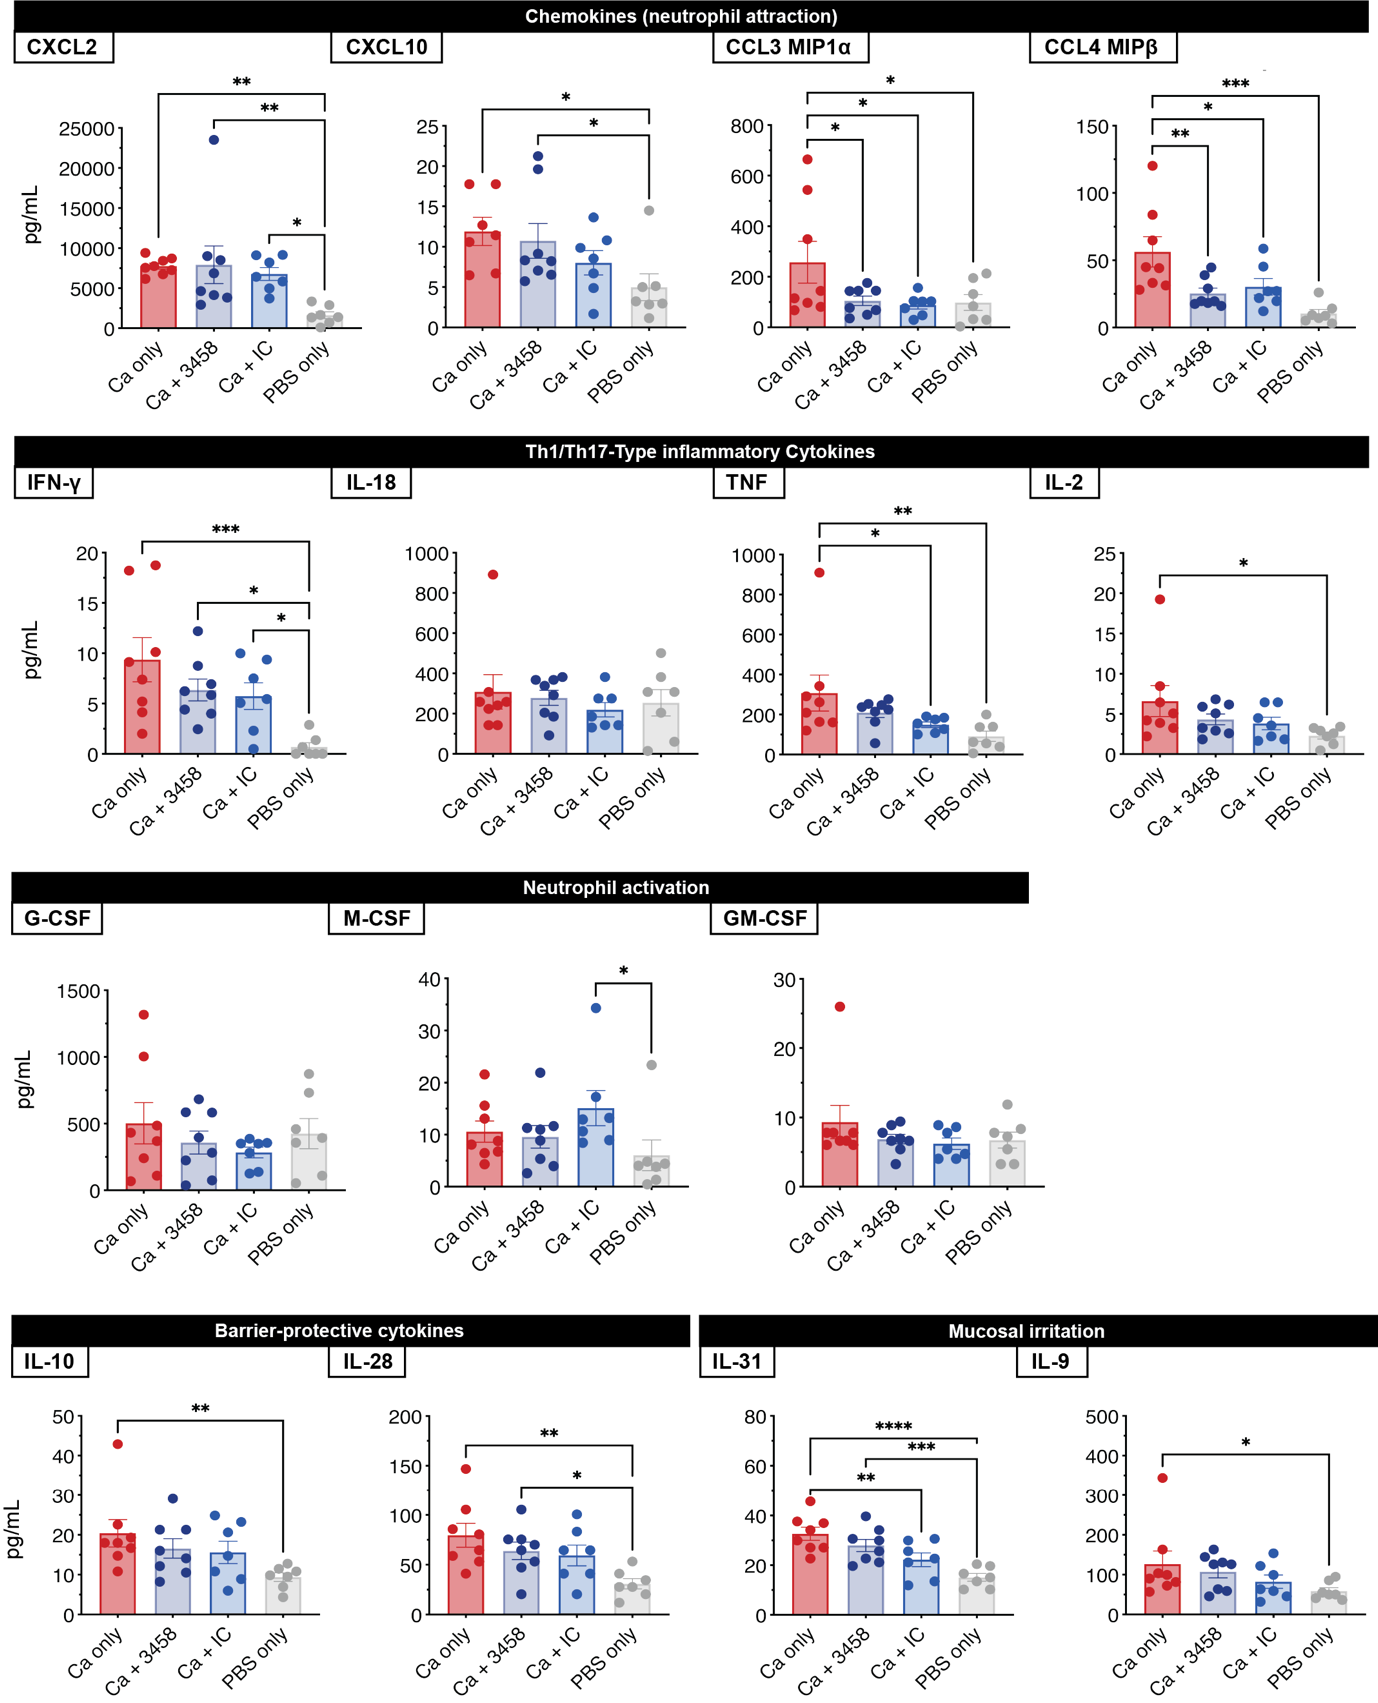
Fig. S9: *S. cerevisiae* 3458 modulates inflammatory mediators in the vaginal niche of VVC mice.**Cytokine and chemokine profiles in vaginal lavage fluids collected on day 10 from *C. albicans*-infected mice treated with Sc3458, the industrial control strain (IC, CNCM I-3856), or PBS. PBS-treated mice serve as uninfected baseline controls (n ≥ 7).

**Supplementary Table 2. Composition of vagina simulative medium.**

| **Component** | **Concentration** | **Supplier** |
| --- | --- | --- |
| NaCl | 3.51 g/L | Sigma-Aldrich |
| KOH | 1.40 g/L | Sigma-Aldrich |
| Ca(OH)2 | 0.222 g/L | Sigma-Aldrich |
| Urea | 0.4 g/L | Sigma-Aldrich |
| Bovine serum albumin (5%) | 40 mL/L | Sigma-Aldrich |
| Glycogen (20%) | 50 mL/L | Sigma-Aldrich |
| Mucin (1.33%) | 18.8 mL/L | Sigma-Aldrich |
| Glucose (40%) | 12.5 mL/L | Sigma Aldrich |
| Glycerol (98%v/v) | 0.13 mL/L | (VWR Chemicals) |
| Lactic acid (85%m/v) | 2.35 mL/L | Sigma Aldrich |
| Acetic acid (100%) | 0.952 mL/L | Ensure |
| Tween | 1 mL/L | Sigma Aldrich |
| α-Amylase (10 Units/mL) | 0.2 mL/L | Sigma Aldrich |

**Table 3. Antibodies and reagents used for flow cytometric analysis of murine vaginal lavage samples.**
The table lists target antigens, fluorophores, suppliers, and relevant identifiers for antibodies used to define immune cell subsets, including neutrophils, macrophages, and eosinophils.

| **Antibody** | **Target Antigen** | **Fluorophore** | **Supplier** | **Clone number** | **Unique identity** |
| --- | --- | --- | --- | --- | --- |
| Fc-receptor block | CD16/CD32 | unlabeled block) | Miltenyi Biotec |  | 130-092-575 |
| Zombie Aqua | Viability dye | Aqua | BioLegend, USA |  | 423101 |
| CD45-FITC | CD45 | FITC | Biolegend | 30-F11 | 103107 |
| Ly6C-APC-Cy7 | Ly6C | APC-Cy7 | BD Biosciences | AL-21 | 560596 |
| Ly6G-AF700 | Ly6G | AF700 | BD Biosciences | 1A8 | 561236 |
| CD11b-eFluor450 | CD11b | eFluor450 | Invitrogen | M1/70 | 48-0112-82 |
| CD11c-PE-Cy7 | CD11c | PE-Cy7 | Biolegend | N418 | 117318 |
| F4/80-APC | F4/80 | APC | eBioscience | BM8 | 17-4801-82 |
| CD64-PE | CD64 | PE | Biolegend | X54-5/7.1 | 139304 |


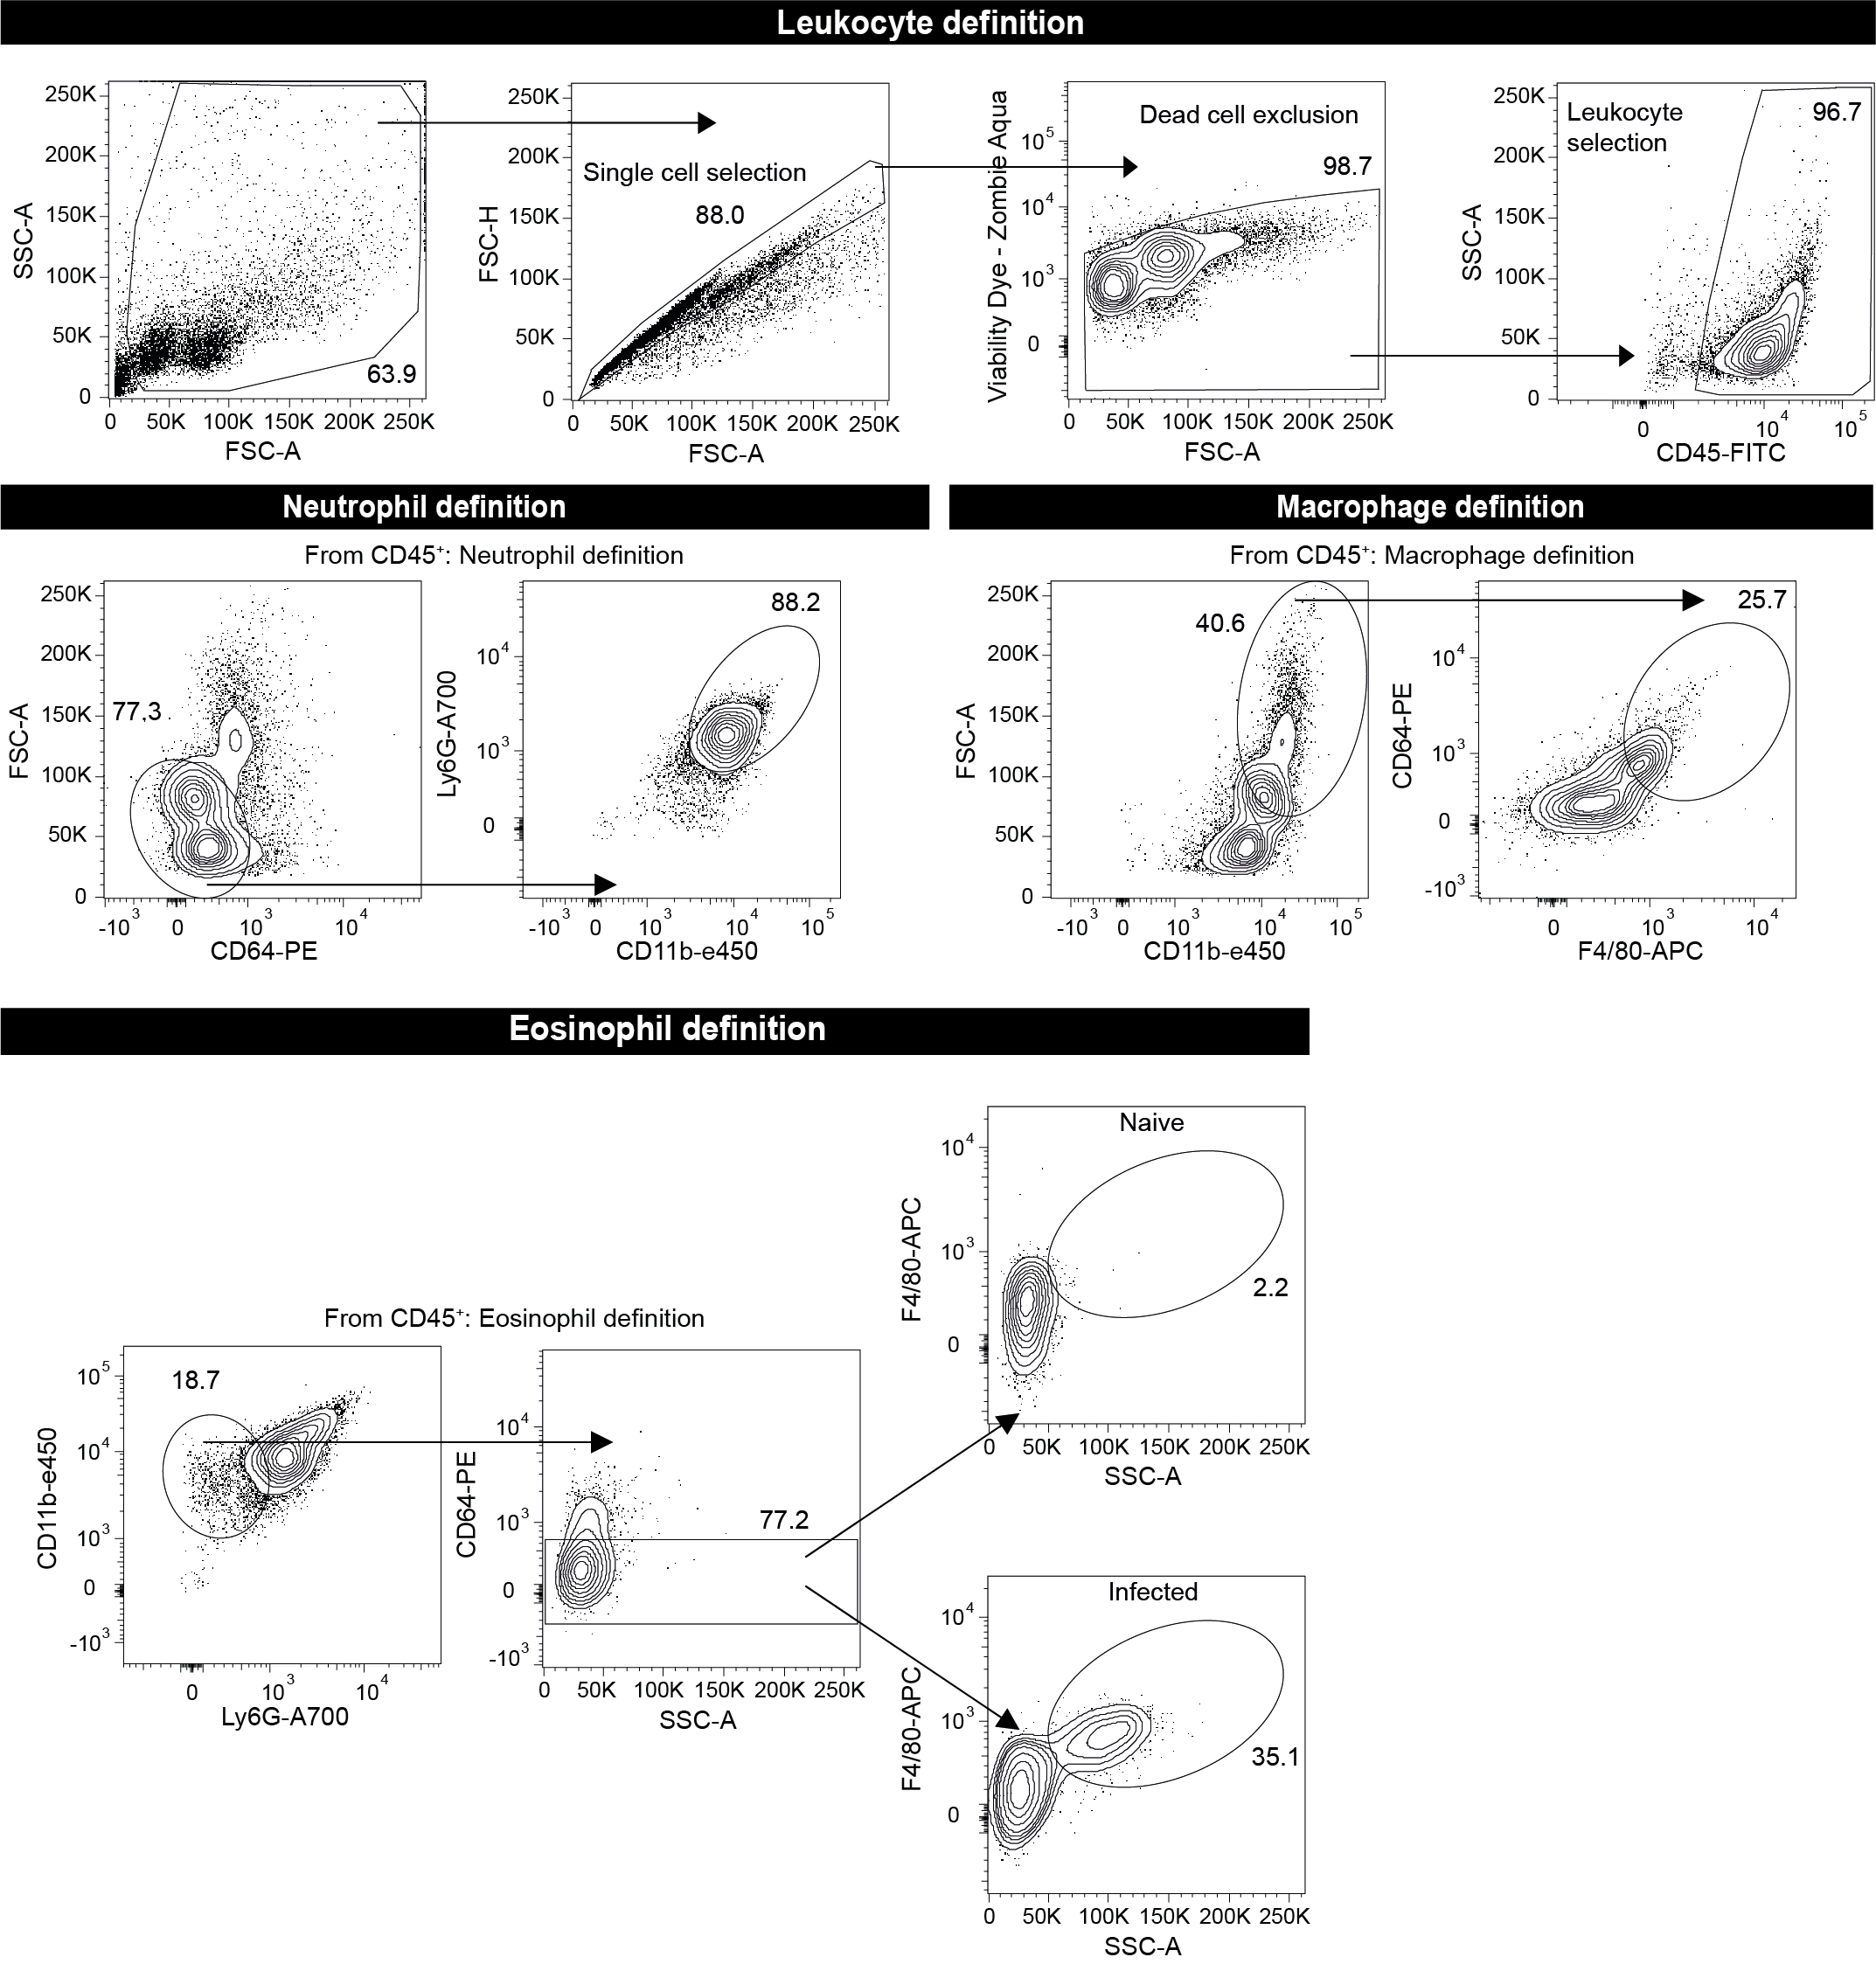


**Fig. S10. Gating strategy for immune cell populations in vaginal lavage fluid from a murine VVC model.** Flow cytometry gating strategy for identifying leukocytes (CD45⁺), neutrophils (CD11b⁺ Ly6G⁺ CD64⁻), macrophages (CD11b⁺ F4/80⁺ CD64⁺), and eosinophils (SiglecF⁺ Ly6G⁻) from vaginal lavage samples. Cells were gated based on size (FSC/SSC), single-cell discrimination, and viability (Zombie Dye⁻). Representative plots are shown for naïve and *Candida albicans*-infected mice.
